# Supplementary material for: Highly Thermally Resistant Bisamide Gelators as Pharmaceutical Crystallization Media
Source: MDPI journal article supplement (doi:10.3390/gels9010026), 2022-12-29
Supplement: s1 [file s1]

# Supporting Information

## Highly Thermally Resistant Bisamide Gelators as Pharmaceutical Crystallization Media

Iván Torres-Moya <sup>1,2,\*</sup>, Abelardo Sánchez <sup>2</sup>, Basanta Saikia <sup>3,4</sup>, Dmitry S. Yufit <sup>3</sup>, Pilar Prieto <sup>2</sup>, J. R. Carrillo <sup>2</sup> and Jonathan W. Steed <sup>3,\*</sup>

<sup>1</sup> Department of Organic Chemistry, Faculty of Chemistry, University of Murcia, 30100 Murcia, Spain

<sup>2</sup> Department of Organic Chemistry, Faculty of Chemical Sciences and Technologies, University of Castilla La Mancha-IRICA, 13071 Ciudad Real, Spain; abelardo.sanchez@uclm.es (A.S.); mariapilar.prieto@uclm.es (P.P.); joseramon.carrillo@uclm.es (J.R.C.)

<sup>3</sup> Department of Chemistry, Durham University, South Road, Durham DH1 3LE, UK; bsaikia1@gmail.com (B.S.); d.s.yufit@durham.ac.uk (D.S.Y.)

<sup>4</sup> Department of Chemical Sciences, Tezpur University, Napaam-784028, India

\* Correspondence: [ivan.torres@um.es](mailto:ivan.torres@um.es) (I.T.-M.); [jon.steed@durham.ac.uk](mailto:jon.steed@durham.ac.uk) (J.W.S.)

### 1. Gelation test

(S= Soluble, I= Insoluble, P= Precipitate, PG= Partial Gel, G= Gel)

**Table S1.** Gelation test for G1 at a concentration of 2% wt.

| Solvent                | 30 min | 4h | 24h | 48h | 72h |
|------------------------|--------|----|-----|-----|-----|
| Chloroform             | S      | S  | S   | S   | S   |
| Dichloromethane        | PG     | PG | PG  | G   | G   |
| Diethyl ether          | I      | I  | I   | S   | S   |
| Diethylene glycol      | S      | S  | C   | C   | C   |
| DMSO                   | S      | S  | S   | S   | S   |
| Ethanol                | S      | S  | G   | G   | G   |
| Hexane                 | S      | P  | P   | P   | P   |
| THF                    | S      | P  | P   | P   | P   |
| 1,4-dioxane            | I      | I  | I   | I   | I   |
| 1-butanol              | S      | S  | S   | S   | S   |
| 1-pentanol             | G      | G  | G   | G   | G   |
| 1-propanol             | PG     | PG | PG  | G   | G   |
| 2-butanol              | G      | G  | G   | G   | G   |
| 2-propanol             | S      | S  | S   | P   | P   |
| Acetone                | G      | G  | G   | G   | G   |
| Acetonitrile           | G      | G  | G   | G   | G   |
| Benzyl alcohol         | S      | S  | S   | S   | S   |
| Methanol               | S      | S  | S   | S   | S   |
| Cyclopentanone         | S      | S  | S   | P   | P   |
| Cyclohexane            | S      | S  | S   | P   | P   |
| Water                  | S      | S  | G   | G   | G   |
| Diisopropylether       | I      | I  | I   | I   | I   |
| DMF                    | S      | S  | S   | S   | S   |
| 1,4-butanediol         | S      | S  | S   | S   | S   |
| Ethyl acetate          | G      | G  | G   | G   | G   |
| 1,2-dibromoethane      | I      | I  | I   | I   | I   |
| Toluene                | S      | S  | S   | S   | S   |
| Nitromethane           | S      | S  | S   | S   | S   |
| o-Xylene               | I      | I  | I   | I   | I   |
| 1,2,4-trichlorobenzene | I      | I  | I   | I   | I   |

**Table S2.** Gelation test for **G1** at a concentration of 1% wt.

| Solvent                | 30 min | 4h | 24h | 48h | 72h |
|------------------------|--------|----|-----|-----|-----|
| Chloroform             | S      | S  | S   | S   | S   |
| Dichloromethane        | G      | G  | G   | G   | G   |
| Diethyl ether          | I      | I  | S   | S   | S   |
| Diethylene glycol      | S      | S  | C   | C   | C   |
| DMSO                   | S      | S  | S   | S   | S   |
| Ethanol                | S      | S  | S   | S   | S   |
| Hexane                 | S      | P  | P   | P   | P   |
| THF                    | S      | P  | P   | P   | P   |
| 1,4-dioxane            | I      | I  | I   | I   | I   |
| 1-butanol              | S      | S  | S   | S   | S   |
| 1-pentanol             | S      | S  | G   | G   | G   |
| 1-propanol             | S      | G  | G   | G   | G   |
| 2-butanol              | S      | S  | S   | S   | S   |
| 2-propanol             | S      | S  | S   | P   | P   |
| Acetone                | S      | S  | S   | S   | S   |
| Acetonitrile           | S      | S  | S   | S   | S   |
| Benzyl alcohol         | S      | S  | S   | S   | S   |
| Methanol               | S      | S  | S   | S   | S   |
| Cyclopentanone         | S      | S  | S   | P   | P   |
| Cyclohexane            | S      | S  | S   | P   | P   |
| Water                  | S      | S  | S   | S   | G   |
| Diisopropylether       | I      | I  | I   | I   | I   |
| DMF                    | S      | S  | S   | S   | S   |
| 1,4-butanediol         | S      | S  | S   | S   | S   |
| Ethyl acetate          | G      | G  | G   | G   | G   |
| 1,2-dibromoethane      | I      | I  | I   | I   | I   |
| Toluene                | S      | S  | S   | S   | S   |
| Nitromethane           | S      | S  | S   | S   | S   |
| o-Xylene               | S      | S  | S   | S   | S   |
| 1,2,4-trichlorobenzene | S      | S  | S   | S   | S   |

**Table S3.** Gelation test for **G1** at a concentration of 0.5% wt.

| Solvent                | 30 min | 4h | 24h | 48h | 72h |
|------------------------|--------|----|-----|-----|-----|
| Chloroform             | S      | S  | S   | S   | S   |
| Dichloromethane        | S      | S  | S   | S   | S   |
| Diethyl ether          | S      | S  | S   | S   | S   |
| Diethylene glycol      | S      | S  | C   | C   | C   |
| DMSO                   | S      | S  | S   | S   | S   |
| Ethanol                | S      | S  | S   | S   | S   |
| Hexane                 | S      | P  | P   | P   | P   |
| THF                    | S      | P  | P   | P   | P   |
| 1,4-dioxane            | I      | I  | I   | I   | I   |
| 1-butanol              | S      | S  | S   | S   | S   |
| 1-pentanol             | S      | S  | S   | S   | S   |
| 1-propanol             | S      | S  | S   | S   | S   |
| 2-butanol              | S      | S  | S   | S   | S   |
| 2-propanol             | S      | S  | S   | P   | P   |
| Acetone                | S      | S  | S   | S   | S   |
| Acetonitrile           | S      | S  | S   | S   | S   |
| Benzyl alcohol         | S      | S  | S   | S   | S   |
| Methanol               | S      | S  | S   | S   | S   |
| Cyclopentanone         | S      | S  | S   | P   | P   |
| Cyclohexane            | S      | S  | S   | P   | P   |
| Water                  | S      | S  | S   | S   | S   |
| Diisopropylether       | S      | S  | S   | S   | S   |
| DMF                    | S      | S  | S   | S   | S   |
| 1,4-butanediol         | S      | S  | S   | S   | S   |
| Ethyl acetate          | S      | S  | S   | S   | S   |
| 1,2-dibromoethane      | S      | S  | S   | S   | S   |
| Toluene                | S      | S  | S   | S   | S   |
| Nitromethane           | S      | S  | S   | S   | S   |
| o-Xylene               | S      | S  | S   | S   | S   |
| 1,2,4-trichlorobenzene | S      | S  | S   | S   | S   |

**Table S4.** Gelation test for **G2** at a concentration of 2% wt.

| Solvent                | 30 min | 4h | 24h | 48h | 72h |
|------------------------|--------|----|-----|-----|-----|
| Chloroform             | S      | P  | P   | P   | P   |
| Dichloromethane        | S      | P  | P   | P   | P   |
| Diethyl ether          | S      | P  | P   | P   | P   |
| Diethylene glycol      | S      | S  | S   | S   | S   |
| DMSO                   | S      | S  | S   | S   | S   |
| Ethanol                | S      | C  | C   | C   | C   |
| Hexane                 | S      | P  | P   | P   | P   |
| THF                    | S      | S  | S   | S   | S   |
| 1,4-dioxane            | S      | P  | P   | P   | P   |
| 1-butanol              | S      | P  | P   | P   | P   |
| 1-pentanol             | S      | P  | P   | P   | P   |
| 1-propanol             | S      | P  | P   | P   | P   |
| 2-butanol              | S      | P  | P   | P   | P   |
| 2-propanol             | S      | P  | P   | P   | P   |
| Acetone                | S      | S  | S   | S   | S   |
| Acetonitrile           | S      | P  | P   | P   | P   |
| Benzyl alcohol         | S      | P  | P   | P   | P   |
| Methanol               | S      | P  | P   | P   | P   |
| Cyclopentanone         | S      | P  | P   | P   | P   |
| Cyclohexane            | S      | P  | P   | P   | P   |
| Water                  | S      | S  | S   | S   | S   |
| Diisopropylether       | S      | S  | S   | S   | S   |
| DMF                    | S      | S  | S   | S   | S   |
| 1,4-butanediol         | S      | S  | S   | S   | S   |
| Ethyl acetate          | S      | P  | P   | P   | P   |
| 1,2-dibromoethane      | S      | S  | S   | S   | S   |
| Toluene                | S      | S  | S   | S   | S   |
| Nitromethane           | S      | P  | P   | P   | P   |
| o-Xylene               | S      | P  | P   | P   | P   |
| 1,2,4-trichlorobenzene | S      | P  | P   | P   | P   |

**Table S5.** Gelation test for **G2** at a concentration of 1% wt.

| Solvent                | 30 min | 4h | 24h | 48h | 72h |
|------------------------|--------|----|-----|-----|-----|
| Chloroform             | S      | P  | P   | P   | P   |
| Dichloromethane        | S      | P  | P   | P   | P   |
| Diethyl ether          | S      | P  | P   | P   | P   |
| Diethylene glycol      | S      | S  | S   | S   | S   |
| DMSO                   | S      | S  | S   | S   | S   |
| Ethanol                | S      | C  | C   | C   | C   |
| Hexane                 | S      | P  | P   | P   | P   |
| THF                    | S      | S  | S   | S   | S   |
| 1,4-dioxane            | S      | P  | P   | P   | P   |
| 1-butanol              | S      | P  | P   | P   | P   |
| 1-pentanol             | S      | P  | P   | P   | P   |
| 1-propanol             | S      | P  | P   | P   | P   |
| 2-butanol              | S      | P  | P   | P   | P   |
| 2-propanol             | S      | P  | P   | P   | P   |
| Acetone                | S      | S  | S   | S   | S   |
| Acetonitrile           | S      | P  | P   | P   | P   |
| Benzyl alcohol         | S      | P  | P   | P   | P   |
| Methanol               | S      | P  | P   | P   | P   |
| Cyclopentanone         | S      | P  | P   | P   | P   |
| Cyclohexane            | S      | P  | P   | P   | P   |
| Water                  | S      | S  | S   | S   | S   |
| Diisopropylether       | S      | S  | S   | S   | S   |
| DMF                    | S      | S  | S   | S   | S   |
| 1,4-butanediol         | S      | S  | S   | S   | S   |
| Ethyl acetate          | S      | P  | P   | P   | P   |
| 1,2-dibromoethane      | S      | S  | S   | S   | S   |
| Toluene                | S      | S  | S   | S   | S   |
| Nitromethane           | S      | P  | P   | P   | P   |
| o-Xylene               | S      | P  | P   | P   | P   |
| 1,2,4-trichlorobenzene | S      | P  | P   | P   | P   |

**Table S6.** Gelation test for **G2** at a concentration of 0.5% wt.

| Solvent                | 30 min | 4h | 24h | 48h | 72h |
|------------------------|--------|----|-----|-----|-----|
| Chloroform             | S      | P  | P   | P   | P   |
| Dichloromethane        | S      | P  | P   | P   | P   |
| Diethyl ether          | S      | P  | P   | P   | P   |
| Diethylene glycol      | S      | S  | S   | S   | S   |
| DMSO                   | S      | S  | S   | S   | S   |
| Ethanol                | S      | C  | C   | C   | C   |
| Hexane                 | S      | P  | P   | P   | P   |
| THF                    | S      | S  | S   | S   | S   |
| 1,4-dioxane            | S      | P  | P   | P   | P   |
| 1-butanol              | S      | P  | P   | P   | P   |
| 1-pentanol             | S      | P  | P   | P   | P   |
| 1-propanol             | S      | P  | P   | P   | P   |
| 2-butanol              | S      | P  | P   | P   | P   |
| 2-propanol             | S      | P  | P   | P   | P   |
| Acetone                | S      | S  | S   | S   | S   |
| Acetonitrile           | S      | P  | P   | P   | P   |
| Benzyl alcohol         | S      | P  | P   | P   | P   |
| Methanol               | S      | P  | P   | P   | P   |
| Cyclopentanone         | S      | P  | P   | P   | P   |
| Cyclohexane            | S      | P  | P   | P   | P   |
| Water                  | S      | S  | S   | S   | S   |
| Diisopropylether       | S      | S  | S   | S   | S   |
| DMF                    | S      | S  | S   | S   | S   |
| 1,4-butanediol         | S      | S  | S   | S   | S   |
| Ethyl acetate          | S      | P  | P   | P   | P   |
| 1,2-dibromoethane      | S      | S  | S   | S   | S   |
| Toluene                | S      | S  | S   | S   | S   |
| Nitromethane           | S      | P  | P   | P   | P   |
| o-Xylene               | S      | P  | P   | P   | P   |
| 1,2,4-trichlorobenzene | S      | P  | P   | P   | P   |

**Table S7.** Gelation test for **G3** at a concentration of 2% wt.

| Solvent                | 30 min | 4h | 24h | 48h | 72h |
|------------------------|--------|----|-----|-----|-----|
| Chloroform             | S      | P  | P   | P   | P   |
| Dichloromethane        | S      | P  | P   | P   | P   |
| Diethyl ether          | S      | P  | P   | P   | P   |
| Diethylene glycol      | S      | S  | S   | S   | S   |
| DMSO                   | S      | S  | S   | S   | S   |
| Ethanol                | S      | C  | C   | C   | C   |
| Hexane                 | S      | P  | P   | P   | P   |
| THF                    | S      | S  | S   | S   | S   |
| 1,4-dioxane            | S      | P  | P   | P   | P   |
| 1-butanol              | S      | P  | P   | P   | P   |
| 1-pentanol             | S      | P  | P   | P   | P   |
| 1-propanol             | S      | P  | P   | P   | P   |
| 2-butanol              | S      | P  | P   | P   | P   |
| 2-propanol             | S      | P  | P   | P   | P   |
| Acetone                | S      | S  | S   | S   | S   |
| Acetonitrile           | S      | P  | P   | P   | P   |
| Benzyl alcohol         | S      | P  | P   | P   | P   |
| Methanol               | S      | P  | P   | P   | P   |
| Cyclopentanone         | S      | P  | P   | P   | P   |
| Cyclohexane            | S      | P  | P   | P   | P   |
| Water                  | S      | S  | S   | S   | S   |
| Diisopropylether       | S      | S  | S   | S   | S   |
| DMF                    | S      | S  | S   | S   | S   |
| 1,4-butanediol         | S      | S  | S   | S   | S   |
| Ethyl acetate          | S      | P  | P   | P   | P   |
| 1,2-dibromoethane      | S      | S  | S   | S   | S   |
| Toluene                | S      | S  | S   | S   | S   |
| Nitromethane           | S      | P  | P   | P   | P   |
| o-Xylene               | S      | P  | P   | P   | P   |
| 1,2,4-trichlorobenzene | S      | P  | P   | P   | P   |

**Table S8.** Gelation test for **G3** at a concentration of 1% wt.

| Solvent                | 30 min | 4h | 24h | 48h | 72h |
|------------------------|--------|----|-----|-----|-----|
| Chloroform             | S      | P  | P   | P   | P   |
| Dichloromethane        | S      | P  | P   | P   | P   |
| Diethyl ether          | S      | P  | P   | P   | P   |
| Diethylene glycol      | S      | S  | S   | S   | S   |
| DMSO                   | S      | S  | S   | S   | S   |
| Ethanol                | S      | C  | C   | C   | C   |
| Hexane                 | S      | P  | P   | P   | P   |
| THF                    | S      | S  | S   | S   | S   |
| 1,4-dioxane            | S      | P  | P   | P   | P   |
| 1-butanol              | S      | P  | P   | P   | P   |
| 1-pentanol             | S      | P  | P   | P   | P   |
| 1-propanol             | S      | P  | P   | P   | P   |
| 2-butanol              | S      | P  | P   | P   | P   |
| 2-propanol             | S      | P  | P   | P   | P   |
| Acetone                | S      | S  | S   | S   | S   |
| Acetonitrile           | S      | P  | P   | P   | P   |
| Benzyl alcohol         | S      | P  | P   | P   | P   |
| Methanol               | S      | P  | P   | P   | P   |
| Cyclopentanone         | S      | P  | P   | P   | P   |
| Cyclohexane            | S      | P  | P   | P   | P   |
| Water                  | S      | S  | S   | S   | S   |
| Diisopropylether       | S      | S  | S   | S   | S   |
| DMF                    | S      | S  | S   | S   | S   |
| 1,4-butanediol         | S      | S  | S   | S   | S   |
| Ethyl acetate          | S      | P  | P   | P   | P   |
| 1,2-dibromoethane      | S      | S  | S   | S   | S   |
| Toluene                | S      | S  | S   | S   | S   |
| Nitromethane           | S      | P  | P   | P   | P   |
| o-Xylene               | S      | P  | P   | P   | P   |
| 1,2,4-trichlorobenzene | S      | P  | P   | P   | P   |

**Table S9.** Gelation test for **G3** at a concentration of 0.5% wt.

| Solvent                | 30 min | 4h | 24h | 48h | 72h |
|------------------------|--------|----|-----|-----|-----|
| Chloroform             | S      | P  | P   | P   | P   |
| Dichloromethane        | S      | P  | P   | P   | P   |
| Diethyl ether          | S      | P  | P   | P   | P   |
| Diethylene glycol      | S      | S  | S   | S   | S   |
| DMSO                   | S      | S  | S   | S   | S   |
| Ethanol                | S      | C  | C   | C   | C   |
| Hexane                 | S      | P  | P   | P   | P   |
| THF                    | S      | S  | S   | S   | S   |
| 1,4-dioxane            | S      | P  | P   | P   | P   |
| 1-butanol              | S      | P  | P   | P   | P   |
| 1-pentanol             | S      | P  | P   | P   | P   |
| 1-propanol             | S      | P  | P   | P   | P   |
| 2-butanol              | S      | P  | P   | P   | P   |
| 2-propanol             | S      | P  | P   | P   | P   |
| Acetone                | S      | S  | S   | S   | S   |
| Acetonitrile           | S      | P  | P   | P   | P   |
| Benzyl alcohol         | S      | P  | P   | P   | P   |
| Methanol               | S      | P  | P   | P   | P   |
| Cyclopentanone         | S      | P  | P   | P   | P   |
| Cyclohexane            | S      | P  | P   | P   | P   |
| Water                  | S      | S  | S   | S   | S   |
| Diisopropylether       | S      | S  | S   | S   | S   |
| DMF                    | S      | S  | S   | S   | S   |
| 1,4-butanediol         | S      | S  | S   | S   | S   |
| Ethyl acetate          | S      | P  | P   | P   | P   |
| 1,2-dibromoethane      | S      | S  | S   | S   | S   |
| Toluene                | S      | S  | S   | S   | S   |
| Nitromethane           | S      | P  | P   | P   | P   |
| o-Xylene               | S      | P  | P   | P   | P   |
| 1,2,4-trichlorobenzene | S      | P  | P   | P   | P   |

## 2. Rheology experiments

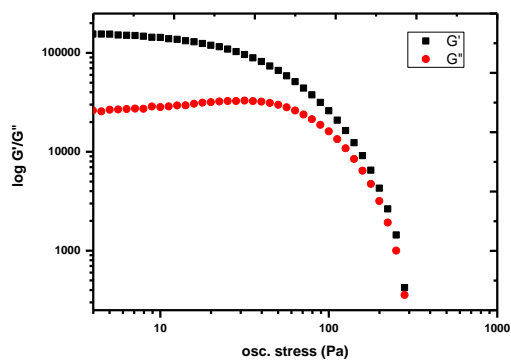

**Figure S1.** Stress sweep experiments at a concentration of 2% wt for **G1** in 2-butanol ( $s=316$  Pa)

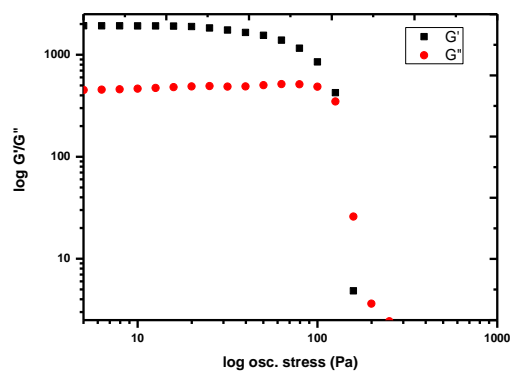

**Figure S2.** Stress sweep experiments at a concentration of 2% wt for **G1** in acetonitrile ( $s=133$  Pa)

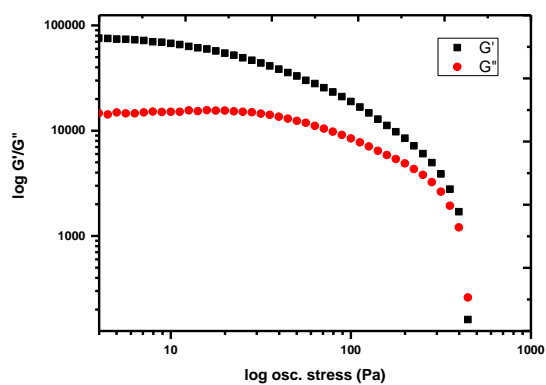

**Figure S3.** Stress sweep experiments at a concentration of 2% wt for **G1** in acetone ( $s=446$  Pa)

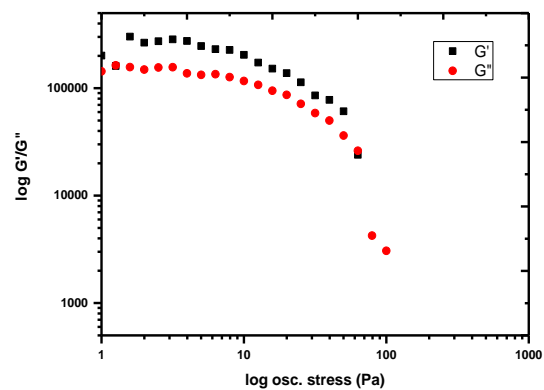

**Figure S4.** Stress sweep experiments at a concentration of 2% wt for **G1** in ethyl acetate ( $s = 63$  Pa)

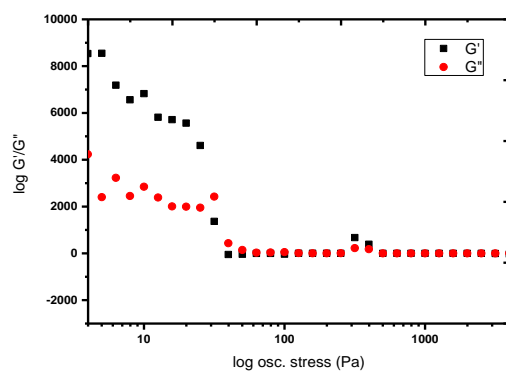

**Figure S5.** Stress sweep experiments at a concentration of 2% wt for **G1** in water ( $s = 32$  Pa)

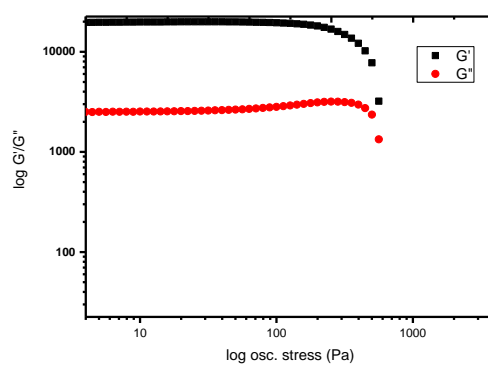

**Figure S6.** Stress sweep experiments at a concentration of 2% wt for **G1** in dichloromethane ( $s = 631$  Pa)

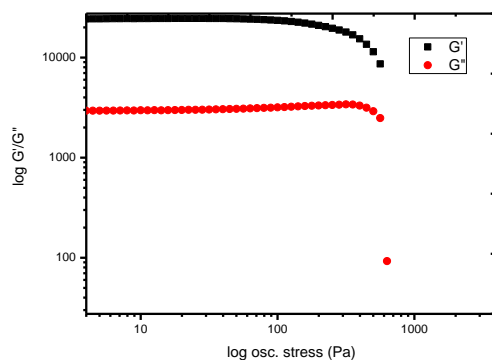

**Figure S7.** Stress sweep experiments at a concentration of 2% wt for **G1** in 1-propanol ( $s = 631$  Pa)

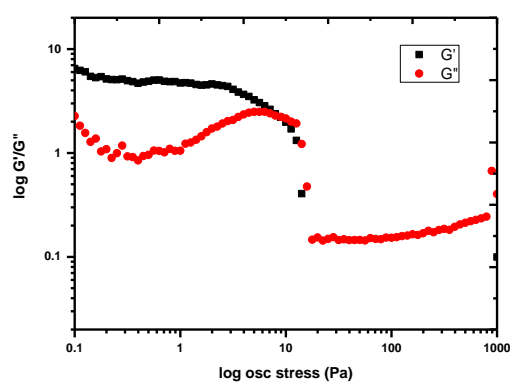

**Figure S8.** Stress sweep experiments at a concentration of 1% wt for **G1** in 1-pentanol ( $s = 10$  Pa)

### 3. Crystallization data of flufenamic acid

#### Crystals of flufenamic acid inside the gelator **G1**

$$a = 39.678 \text{ (9)}$$

$$b = 5.066 \text{ (2)}$$

$$g = 11.954 \text{ (3)}$$

$$V = 2393 \text{ (2)}$$

Orthorhombic P

Space group:  $C_{2/c}$

Form III Polymorph [1]

#### References

[1] López-Mejías, V.; Kampf, J. W.; Matzger, A. J. *J. Am. Chem. Soc.* **2012**, 134, 24, 9872–9875.



#### 4. Crystal data of G2

G2

| Table S10. Crystal data and structure refinement for G2. |                                                                                    |
|----------------------------------------------------------|------------------------------------------------------------------------------------|
| Identification code                                      | G2                                                                                 |
| Empirical formula                                        | C <sub>20</sub> H <sub>24</sub> N <sub>2</sub> O <sub>8</sub> x 2 H <sub>2</sub> O |
| Formula weight                                           | 456.44                                                                             |
| Temperature/K                                            | 120.0                                                                              |
| Crystal system                                           | monoclinic                                                                         |
| Space group                                              | P2 <sub>1</sub> /c                                                                 |
| a/Å                                                      | 15.8619(12)                                                                        |
| b/Å                                                      | 4.7691(4)                                                                          |
| c/Å                                                      | 13.7438(11)                                                                        |
| α/°                                                      | 90                                                                                 |
| β/°                                                      | 96.490(3)                                                                          |
| γ/°                                                      | 90                                                                                 |
| Volume/Å <sup>3</sup>                                    | 1033.01(14)                                                                        |
| Z                                                        | 2                                                                                  |
| ρ <sub>calc</sub> /g/cm <sup>3</sup>                     | 1.467                                                                              |
| μ/mm <sup>-1</sup>                                       | 0.118                                                                              |
| F(000)                                                   | 484.0                                                                              |
| Crystal size/mm <sup>3</sup>                             | 0.22 × 0.15 × 0.02                                                                 |
| Radiation                                                | MoKα (λ = 0.71073)                                                                 |

|                                                  |                                                                  |
|--------------------------------------------------|------------------------------------------------------------------|
| 2 $\Theta$ range for data collection/ $^{\circ}$ | 5.17 to 57.976                                                   |
| Index ranges                                     | $-21 \leq h \leq 21$ , $-6 \leq k \leq 6$ , $-18 \leq l \leq 18$ |
| Reflections collected                            | 15081                                                            |
| Independent reflections                          | 2753 [ $R_{\text{int}} = 0.0650$ , $R_{\text{sigma}} = 0.0582$ ] |
| Data/restraints/parameters                       | 2753/0/201                                                       |
| Goodness-of-fit on $F^2$                         | 1.023                                                            |
| Final R indexes [ $I \geq 2\sigma(I)$ ]          | $R_1 = 0.0461$ , $wR_2 = 0.0927$                                 |
| Final R indexes [all data]                       | $R_1 = 0.0847$ , $wR_2 = 0.1043$                                 |
| Largest diff. peak/hole / $e \text{ \AA}^{-3}$   | 0.27/-0.32                                                       |

**Table S11.** Fractional Atomic Coordinates ( $\times 10^4$ ) and Equivalent Isotropic Displacement Parameters ( $\text{\AA}^2 \times 10^3$ ) for **G2**.  $U_{\text{eq}}$  is defined as 1/3 of the trace of the orthogonalised  $U_{\text{ij}}$  tensor.

| Atom | $x$       | $y$      | $z$        | $U(\text{eq})$ |
|------|-----------|----------|------------|----------------|
| O1   | 9148.6(7) | 3996(2)  | 4582.5(8)  | 16.6(3)        |
| O2   | 7298.0(7) | -2084(2) | 7512.3(8)  | 17.4(3)        |
| O3   | 5993.8(6) | 1187(2)  | 6804.8(8)  | 13.7(2)        |
| O4   | 6040.2(6) | 4145(2)  | 5171.4(8)  | 14.5(3)        |
| N1   | 9620.4(8) | -152(3)  | 5208.4(10) | 13.6(3)        |
| C1   | 9025.1(9) | 1852(3)  | 5053.9(11) | 11.1(3)        |
| C2   | 8225.2(9) | 1425(3)  | 5499.0(11) | 10.9(3)        |
| C3   | 8169.3(9) | -373(3)  | 6286.1(11) | 11.9(3)        |
| C4   | 7415.9(9) | -504(3)  | 6713.0(11) | 12.4(3)        |
| C5   | 6717.2(9) | 1114(3)  | 6341.1(11) | 11.5(3)        |
| C6   | 6770.5(9) | 2795(3)  | 5520.8(11) | 11.6(3)        |
| C7   | 7530.1(9) | 3019(3)  | 5111.1(11) | 11.5(3)        |

|     |            |          |            |         |
|-----|------------|----------|------------|---------|
| C8  | 7974.3(10) | -3903(4) | 7883.7(13) | 17.9(4) |
| C9  | 5464.0(10) | -1258(4) | 6638.1(13) | 17.2(4) |
| C10 | 6064.0(11) | 5844(4)  | 4316.3(12) | 16.6(3) |
| O1W | 10099.8(8) | 4535(3)  | 3010.8(9)  | 18.8(3) |

**Table S12.** Anisotropic Displacement Parameters ( $\text{\AA}^2 \times 10^3$ ) for **G2**. The Anisotropic displacement factor exponent takes the form:  $-2\pi^2[h^2a^{*2}U_{11}+2hka^*b^*U_{12}+\dots]$ .

| Atom | U <sub>11</sub> | U <sub>22</sub> | U <sub>33</sub> | U <sub>23</sub> | U <sub>13</sub> | U <sub>12</sub> |
|------|-----------------|-----------------|-----------------|-----------------|-----------------|-----------------|
| O1   | 14.9(5)         | 14.4(6)         | 21.7(6)         | 5.6(5)          | 6.8(4)          | 1.1(5)          |
| O2   | 16.8(6)         | 21.0(6)         | 15.5(6)         | 9.0(5)          | 6.8(4)          | 4.8(5)          |
| O3   | 11.8(5)         | 14.3(5)         | 16.4(6)         | -0.8(4)         | 8.0(4)          | -1.3(4)         |
| O4   | 10.7(5)         | 19.9(6)         | 13.3(6)         | 4.9(5)          | 2.9(4)          | 4.8(4)          |
| N1   | 8.6(6)          | 12.8(7)         | 20.6(7)         | 3.4(6)          | 7.1(5)          | 0.2(5)          |
| C1   | 11.9(7)         | 10.6(7)         | 10.6(7)         | -1.2(6)         | -0.3(6)         | -0.4(6)         |
| C2   | 11.1(7)         | 10.9(7)         | 11.2(7)         | -2.9(6)         | 3.0(6)          | -1.1(6)         |
| C3   | 12.0(7)         | 11.9(7)         | 11.9(8)         | 0.3(6)          | 1.9(6)          | 1.8(6)          |
| C4   | 15.5(7)         | 13.3(8)         | 8.9(7)          | 0.7(6)          | 3.4(6)          | -0.6(6)         |
| C5   | 11.3(7)         | 12.1(7)         | 11.6(7)         | -2.6(6)         | 4.0(6)          | -2.0(6)         |
| C6   | 11.4(7)         | 11.1(7)         | 12.1(8)         | -2.3(6)         | 1.0(6)          | 1.1(6)          |
| C7   | 13.4(8)         | 10.7(7)         | 10.8(8)         | -0.3(6)         | 3.0(6)          | 0.1(6)          |
| C8   | 17.1(8)         | 19.8(9)         | 17.1(9)         | 7.6(8)          | 2.7(7)          | 2.6(7)          |
| C9   | 15.8(8)         | 14.7(8)         | 22.4(9)         | -0.9(7)         | 7.4(7)          | -3.2(7)         |
| C10  | 14.5(8)         | 19.8(9)         | 15.5(8)         | 6.5(7)          | 1.7(6)          | 3.0(7)          |
| O1W  | 22.2(6)         | 17.2(6)         | 17.9(6)         | 2.8(5)          | 7.1(5)          | 4.3(5)          |

**Table S13. Bond Lengths for G2.**

| Atom | Atom            | Length/Å   |  | Atom | Atom | Length/Å   |
|------|-----------------|------------|--|------|------|------------|
| O1   | C1              | 1.2379(18) |  | N1   | C1   | 1.3435(19) |
| O2   | C4              | 1.3623(18) |  | C1   | C2   | 1.483(2)   |
| O2   | C8              | 1.4285(19) |  | C2   | C3   | 1.391(2)   |
| O3   | C5              | 1.3747(17) |  | C2   | C7   | 1.395(2)   |
| O3   | C9              | 1.4404(19) |  | C3   | C4   | 1.391(2)   |
| O4   | C6              | 1.3643(17) |  | C4   | C5   | 1.399(2)   |
| O4   | C10             | 1.4315(19) |  | C5   | C6   | 1.394(2)   |
| N1   | N1 <sup>1</sup> | 1.398(2)   |  | C6   | C7   | 1.390(2)   |

<sup>1</sup>2-X,-Y,1-Z**Table S14. Bond Angles for G2.**

| Atom | Atom | Atom            | Angle/°    |  | Atom | Atom | Atom | Angle/°    |
|------|------|-----------------|------------|--|------|------|------|------------|
| C4   | O2   | C8              | 117.27(12) |  | O2   | C4   | C3   | 124.59(14) |
| C5   | O3   | C9              | 114.10(12) |  | O2   | C4   | C5   | 115.12(13) |
| C6   | O4   | C10             | 117.12(11) |  | C3   | C4   | C5   | 120.27(14) |
| C1   | N1   | N1 <sup>1</sup> | 118.93(17) |  | O3   | C5   | C4   | 120.86(13) |
| O1   | C1   | N1              | 121.36(13) |  | O3   | C5   | C6   | 119.38(13) |
| O1   | C1   | C2              | 121.50(13) |  | C6   | C5   | C4   | 119.67(13) |
| N1   | C1   | C2              | 117.12(13) |  | O4   | C6   | C5   | 115.43(12) |
| C3   | C2   | C1              | 122.55(13) |  | O4   | C6   | C7   | 124.16(14) |
| C3   | C2   | C7              | 121.07(13) |  | C7   | C6   | C5   | 120.41(14) |
| C7   | C2   | C1              | 116.34(14) |  | C6   | C7   | C2   | 119.16(14) |
| C4   | C3   | C2              | 119.28(14) |  |      |      |      |            |

<sup>1</sup>2-X,-Y,1-Z

**Table S15.** Hydrogen Bonds for **G2**.

| <b>D</b> | <b>H</b> | <b>A</b>         | <b>d(D-H)/Å</b> | <b>d(H-A)/Å</b> | <b>d(D-A)/Å</b> | <b>D-H-A/°</b> |
|----------|----------|------------------|-----------------|-----------------|-----------------|----------------|
| N1       | H1       | O1 <sup>1</sup>  | 0.88(2)         | 2.23(2)         | 2.9905(18)      | 144.6(19)      |
| O1W      | H1WA     | O1W <sup>2</sup> | 0.86(2)         | 1.91(2)         | 2.7672(13)      | 176(2)         |
| O1W      | H1WB     | O1               | 0.88(3)         | 1.92(3)         | 2.7830(17)      | 167(2)         |

<sup>1</sup>+X,-1+Y,+Z; <sup>2</sup>2-X,1/2+Y,1/2-Z
**Table S16.** Selected Torsion Angles for **G2**.

| <b>A</b>        | <b>B</b> | <b>C</b> | <b>D</b>        | <b>Angle/°</b> | <b>A</b> | <b>B</b> | <b>C</b> | <b>D</b> | <b>Angle/°</b> |
|-----------------|----------|----------|-----------------|----------------|----------|----------|----------|----------|----------------|
| N1 <sup>1</sup> | N1       | C1       | O1              | -2.7(3)        | C5       | C4       | O2       | C8       | 176.27(14)     |
| C2              | C1       | N1       | N1 <sup>1</sup> | 179.23(16)     | C5       | C6       | O4       | C10      | -178.65(14)    |
| C3              | C2       | C1       | O1              | -157.26(14)    | C6       | C5       | O3       | C9       | 106.39(16)     |
| C3              | C2       | C1       | N1              | 20.9(2)        | C7       | C2       | C1       | O1       | 20.2(2)        |
| C3              | C4       | O2       | C8              | -5.5(2)        | C7       | C2       | C1       | N1       | -161.67(14)    |
| C4              | C5       | O3       | C9              | -77.18(18)     | C7       | C6       | O4       | C10      | 1.4(2)         |

<sup>1</sup>2-X,-Y,1-Z
**Table S17.** Hydrogen Atom Coordinates (Å×10<sup>4</sup>) and Isotropic Displacement Parameters (Å<sup>2</sup>×10<sup>3</sup>) for **G2**.

| <b>Atom</b> | <b>x</b> | <b>y</b>  | <b>z</b> | <b>U(eq)</b> |
|-------------|----------|-----------|----------|--------------|
| H1          | 9476(14) | -1900(50) | 5307(16) | 44(6)        |
| H3          | 8637(11) | -1440(40) | 6535(12) | 15(4)        |
| H7          | 7590(10) | 4230(40)  | 4587(13) | 15(4)        |
| H8A         | 8161(10) | -5090(40) | 7383(13) | 16(4)        |
| H8B         | 7731(11) | -5000(40) | 8381(14) | 26(5)        |
| H8C         | 8456(12) | -2830(40) | 8175(14) | 26(5)        |
| H9A         | 4988(11) | -920(40)  | 7054(13) | 21(5)        |

|      |           |           |          |       |
|------|-----------|-----------|----------|-------|
| H9B  | 5254(11)  | -1340(40) | 5927(15) | 28(5) |
| H9C  | 5787(11)  | -2890(40) | 6809(12) | 15(4) |
| H10A | 6475(10)  | 7380(40)  | 4455(12) | 14(4) |
| H10B | 6264(11)  | 4740(40)  | 3762(14) | 21(5) |
| H10C | 5483(11)  | 6530(40)  | 4146(12) | 16(4) |
| H1WA | 10035(13) | 6130(50)  | 2717(16) | 40(7) |
| H1WB | 9741(15)  | 4510(50)  | 3454(19) | 53(7) |
